# Supplementary material
Source: publisher figshare collection journal article supplement (https://sage.figshare.com/ndownloader/files/14182808)
Supplement: Supplementary file 1 [file 14182808]

1 **Limb salvage in patients with technical success**

2 In 257 patients with primary technical success, Kaplan-Meier estimate for limb salvage after 5  
3 years was 78 % (SE = .04) for bypass surgery, 85 %, (SE = .04) in PTA patients eligible for  
4 both methods, and 37 %, (SE = .16) in PTA patients unsuitable for open surgery. There was  
5 no significant difference in limb salvage between bypass surgery and PTA in patients eligible  
6 for both methods ( $p = .09$ ), while limb salvage was significantly lower in patients not eligible  
7 for bypass surgery ( $p = .00$ ).

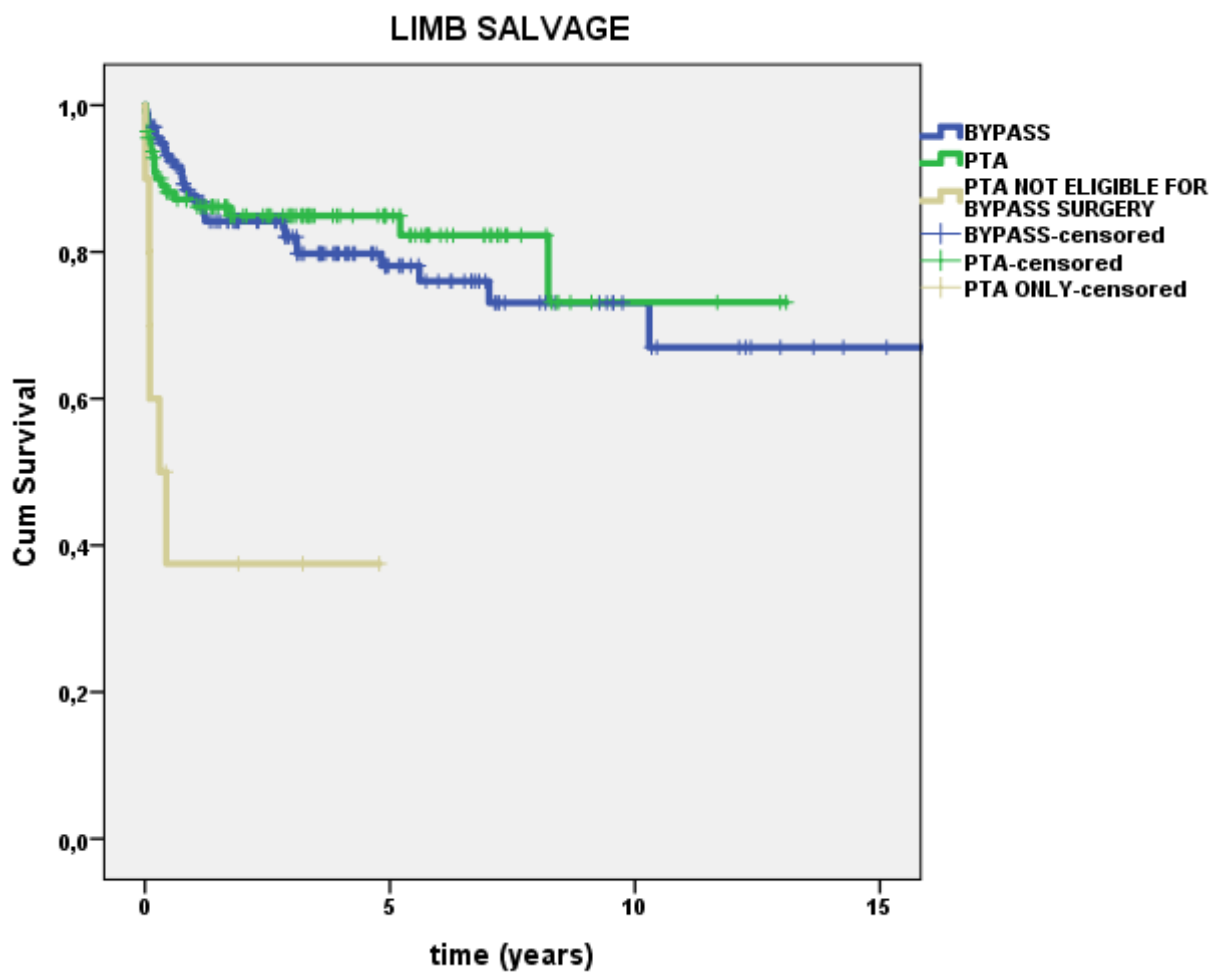

8  
9 **Fig. 3 Limb salvage in patients with technical success**

10

11
